# Supplementary material
Source: MDPI journal article supplement (https://www.mdpi.com/2504-4494/2/3/58)
Supplement: s1 [file s1]

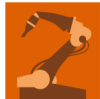

# Supplementary Materials: Transient Liquid Phase Bonding of Al-6063 to Steel Alloy UNS S32304

Mohamed I. Saleh, Hans J. Roven, Tahir I. Khan and Terje Iveland

The Arrhenius equation for diffusion coefficient is [1]:

$$D_L = D_0 \exp\left(-\frac{Q}{RTemp}\right) \quad (1)$$

where  $Q$  is the activation energy ( $Q = 38900$  cal/mol),  $D_0$  is the diffusion coefficient of Cu in liquid Al,  $R$  is the gas constant ( $R = 8.314$ ) and  $Temp$  is the absolute temperature in Kelvin [2].

Du et al. (2003) used solid–liquid contacting technique to calculate  $D_0 = 8.1 \times 10^{-7} \text{ m}^2/\text{s}$  for Cu diffusion in Al at temperatures ranging from (831–919) K [1].

$$D_L = 8.1 \times 10^{-7} \exp\left(-\frac{38900}{8.314 * Temp}\right)$$

The dissolution rate of Cu interlayer can be derived from Equation (1) (Equation (2))

$$V_s = \frac{dY}{dt} = K_1 \sqrt{\frac{D_L}{t}} \quad (2)$$

where  $V_s$  is the dissolution rate of Cu interlayer.

While, the interface displacement follows a general square root law (Equation (3)) [3,4].

$$Y = K_1 \sqrt{4D_L t} \quad (3)$$

where,  $t$  is the total time required for complete dissolution,  $Y$  is the position of solid/liquid interface at time  $t$ ,  $K_1$  is a constant that has a range between 0.13 and 1.18 for different binary systems. For Al-Cu phase diagram  $K$  is 0.13 [3,4].

Assuming that the interlayer has an initial thickness  $T$ ,  $T = K_1 \sqrt{4D_L t}$ , thus,  $t = \frac{T^2}{4K_1^2 D_L}$ .

Table S1. shows the calculations of  $t$  and  $V_s$  at different bonding temperatures. An inverse linear relationship between the bonding temperature and total dissolution time of the interlayer can be observed in Figure S1. The total dissolution time of 10  $\mu\text{m}$  thick Cu foil decreased from 0.54 s at 550 °C to 0.47 s at 570 °C. In addition, there was a direct correlation between bonding temperature and interlayer dissolution rate. The highest dissolution rate achieved was  $1.06 \times 10^{-5} \text{ m/s}$  at 570 °C.

**Table S1.** Dissolution time and rate of Cu interlayer at different bonding temperatures.

| Temperature (K) | $D_L$                 | $t(\text{s})$ | $V_s(\text{m/s})$     |
|-----------------|-----------------------|---------------|-----------------------|
| 823             | $2.75 \times 10^{-9}$ | 0.54          | $9.29 \times 10^{-6}$ |
| 828             | $2.85 \times 10^{-9}$ | 0.52          | $9.63 \times 10^{-6}$ |
| 833             | $2.95 \times 10^{-9}$ | 0.50          | $9.99 \times 10^{-6}$ |
| 843             | $3.15 \times 10^{-9}$ | 0.47          | $1.06 \times 10^{-5}$ |

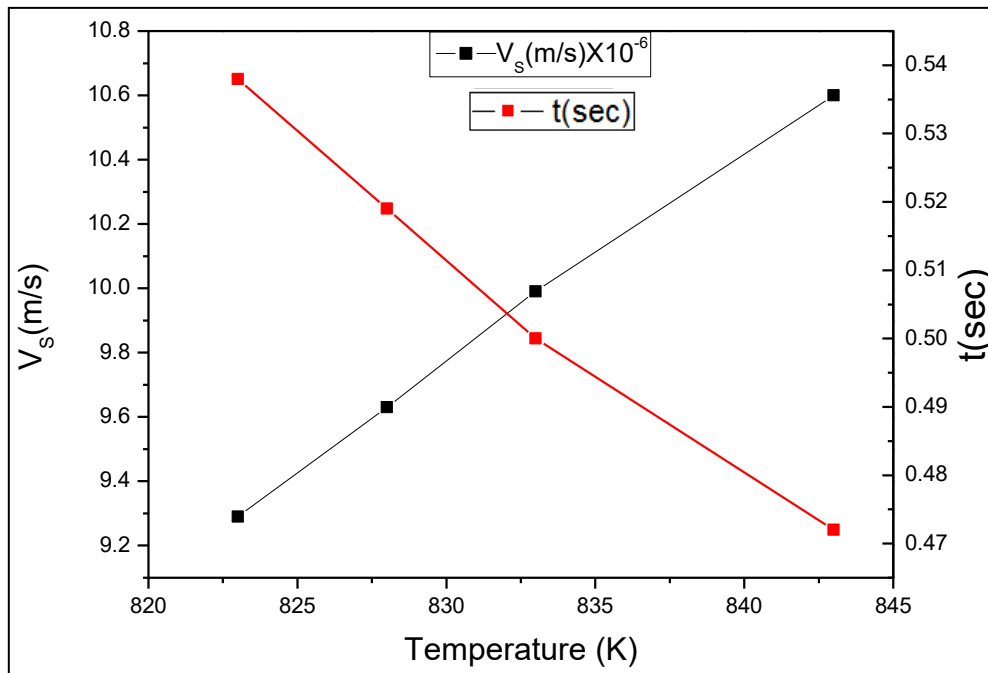

Figure S1. Effect of bonding temperature on  $t$  and  $V_s$  of Cu interlayer.

## References

1. Du, Y.; Chang, Y.A.; Huang, B.; Gong, W.; Jin, Z.; Xu, H.; Yuan, Z.; Liu, Y.; He, Y.; Xie, F.Y. Diffusion coefficients of some solutes in fcc and liquid Al: Critical evaluation and correlation. *Mater. Sci. Eng. A* **2003**, *363*, 140–151.
2. Nag, P.K. *Engineering Thermodynamics*, 5th ed.; McGraw Hill Education: New Delhi, India, 2013; p. 914.
3. Shirzadi, A.A. Diffusion Bonding Aluminium Alloys and Composites: New Approaches and Modelling. In *Department of Materials Science and Metallurgy*; University of Cambridge: Cambridge, UK, 1998; p. 158.
4. Wu, M.F.; Si, N.C. Chen, J. Contact reactive brazing of Al alloy/Cu/stainless steel joints and dissolution behaviors of interlayer. *Trans. Nonferrous Met. Soc. China* **2011**, *21*, 1035–1039.

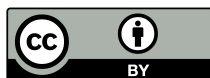

© 2018 by the authors. Submitted for possible open access publication under the terms and conditions of the Creative Commons Attribution (CC BY) license (<http://creativecommons.org/licenses/by/4.0/>).
